# Supplementary material for: Force Generation on the Hallux Is More Affected by the Ankle Joint Angle than the Lesser Toes: An In Vivo Human Study
Source: MDPI journal article supplement (doi:10.3390/biology10010048), 2021-01-12
Supplement: s1 [file s1]

**Supplementary Table S1.** The mean values of the intra-subject coefficient of variation (CV) of the measurement of the first and second–fifth metatarsophalangeal joints (MTPJs). The CV was calculated by dividing the standard deviation of the repeated measurements by mean value.

| Ankle position                  | CV (%)              |     |     |     |         |     |     |     |                  |     |     |     |
|---------------------------------|---------------------|-----|-----|-----|---------|-----|-----|-----|------------------|-----|-----|-----|
|                                 | 20° plantar-flexion |     |     |     | neutral |     |     |     | 20° dorsiflexion |     |     |     |
| Dorsiflexion angle of the MTPJs | 0°                  | 15° | 30° | 45° | 0°      | 15° | 30° | 45° | 0°               | 15° | 30° | 45° |
| First MTPJ                      | 3.3                 | 2.9 | 4.5 | 2.7 | 2.5     | 2.1 | 3.1 | 3.3 | 2.4              | 2.1 | 2.7 | 2.3 |
| Second–fifth MTPJs              | 3.7                 | 4.1 | 3.4 | 2.7 | 3.3     | 2.8 | 3.3 | 3.6 | 2.7              | 3.6 | 2.7 | 3.2 |

**Supplementary Table S2.** The values of the standard error of the measurement (SEM) of the first and second–fifth metatarsophalangeal joints (MTPJs). The SEM was calculated by dividing the standard deviation of the measurements by the number of subjects.

| Ankle position                  | SEM (Nm)            |     |     |     |         |     |     |     |                  |     |     |     |
|---------------------------------|---------------------|-----|-----|-----|---------|-----|-----|-----|------------------|-----|-----|-----|
|                                 | 20° plantar-flexion |     |     |     | neutral |     |     |     | 20° dorsiflexion |     |     |     |
| Dorsiflexion angle of the MTPJs | 0°                  | 15° | 30° | 45° | 0°      | 15° | 30° | 45° | 0°               | 15° | 30° | 45° |
| First MTPJ                      | 0.5                 | 0.4 | 0.4 | 0.4 | 0.5     | 0.7 | 0.6 | 0.8 | 0.7              | 0.8 | 0.8 | 0.8 |
| Second–fifth MTPJs              | 0.4                 | 0.4 | 0.3 | 0.2 | 0.6     | 0.6 | 0.5 | 0.6 | 0.3              | 0.3 | 0.3 | 0.3 |
